# Supplementary material for: Impact of long-term dietary habits on the human gut resistome in the Dutch population
Source: PubMed Central journal article supplement (PMC8814023; doi:10.1038/s41598-022-05817-4), 2022-02-03
Supplement: 41598_2022_5817_MOESM2_ESM.pdf [file 41598_2022_5817_MOESM2_ESM.pdf]

**Table S1.** List of all antibiotic resistance genes detected by both techniques (shotgun metagenome sequencing and Rescap) or only one of them. Highlighted in grey are the genes that do not have a probe for capture in the Rescap technique.

| Antibiotic resistance genes detected by |              |            |
|-----------------------------------------|--------------|------------|
| ResCap and MSS                          | only ResCap  | only MSS   |
| aac(3)-IIId                             | aac(3)-IIa   | aac(3)-IV  |
| aadA1                                   | aac(3)-IIc   | aadD       |
| aadA2                                   | aac(3)-IIe   | aph(4)-Ia  |
| aadA5                                   | aadA15       | blaCMY-150 |
| ant(6)-Ia                               | aadA4        | blaGES-1   |
| ant(6)-Ib                               | aadA8b       | blaMIR-2   |
| aph(6)-Id                               | blaACT-10    | blaOXA-232 |
| blaACI-1                                | blaACT-14    | blaOXY-2-6 |
| blaACT-12                               | blaACT-16    | blaSHV-185 |
| blaCMY-48                               | blaACT-4     | blaTEM-1C  |
| blaCMY-82                               | blaACT-5     | cfiA1      |
| blaCTX-M-15                             | blaACT-6     | cfiA2      |
| blaCTX-M-32                             | blaACT-7     | cfr(C)     |
| blaOXA-347                              | blaACT-9     | crpP       |
| blaOXY-2-7                              | blaCMY-110   | ere(D)     |
| blaTEM-116                              | blaCMY-117   | erm(C)     |
| blaTEM-1B                               | blaCMY-51    | lnu(P)     |
| cat                                     | blaCTX-M-101 | mecA       |
| catA1                                   | blaLEN21     | nimA       |
| catP                                    | blaMIR-5     | nimB       |
| catQ                                    | blaOKP-B-5   | nimC       |
| catS                                    | blaOXA-1     | nimD       |
| cepA                                    | blaOXA-212   | nimE       |
| cepA-29                                 | blaOXA-395   | nimF       |
| cepA-44                                 | blaOXA-486   | nimH       |
| cepA-49                                 | blaOXY-2-2   | nimJ       |
| cfr(B)                                  | blaPAO       | qnrB19     |
| cfxA                                    | blaPLA1a     | qnrB38     |
| cfxA3                                   | blaSHV-48    | tet(D)     |

 Absent in the ResCap probe database

|        |                   |          |
|--------|-------------------|----------|
| cfxA4  | blaTEM-102        | tet(S)   |
| cfxA5  | blaTEM-182        | tetA(46) |
| cfxA6  | blaTEM-1A         | tetB(46) |
| dfrA1  | blaTEM-40         |          |
| dfrA12 | cat(pC194)        |          |
| dfrA14 | catB7             |          |
| dfrA17 | cfxA2             |          |
| dfrA7  | cmr               |          |
| erm(B) | erm(A)            |          |
| erm(F) | fosA5             |          |
| erm(G) | lnu(A)            |          |
| erm(Q) | lnu(B)            |          |
| erm(T) | mre(A)            |          |
| erm(X) | npmA              |          |
| floR   | qnrS5             |          |
| fosA   | rmtD              |          |
| fosA2  | rmtG              |          |
| lnu(C) | tet(39)           |          |
| lsa(A) | tet(O/W/32/O)     |          |
| lsa(C) | tet(O/W/32/O/W/O) |          |
| lsa(E) | tet(O/W/O)-1      |          |
| mdf(A) | tet(O/W/O)-3      |          |
| mef(A) | tet(S/M)          |          |
| mph(A) | tet(W/32/O)       |          |
| msr(C) | tet(X4)           |          |
| msr(D) | VanC2XY           |          |
| oqxA   | VanC3XY           |          |
| oqxB   | VanC4XY           |          |
| qepA4  | VanGXY            |          |
| qnrS1  | VanXY             |          |
| rmtD2  |                   |          |
| rmtF   |                   |          |
| sul1   |                   |          |
| sul2   |                   |          |

tet(32)  
tet(40)  
tet(44)  
tet(A)  
tet(B)  
tet(L)  
tet(M)  
tet(O)  
tet(O/32/O)  
tet(O/W)  
tet(O/W)-1  
tet(O/W)-2  
tet(O/W/O)-2  
tet(Q)  
tet(W)  
tet(X)  
tet(X6)  
tetA(P)  
tetB(P)  
VanG2XY  
VanHBX  
VanHDX  
vat(E)

---
