# Supplementary material for: Impact of long-term dietary habits on the human gut resistome in the Dutch population
Source: PubMed Central journal article supplement (PMC8814023; doi:10.1038/s41598-022-05817-4), 2022-02-03
Supplement: 41598_2022_5817_MOESM3_ESM.pdf [file 41598_2022_5817_MOESM3_ESM.pdf]

**Table S2.** Description of the mock community composition used as positive control in the shotgun metagenome analysis. Relative abundance is shown as determined by the manufacture, when analyzed with mOTUs2 or Metaphlan 3.

| Expected mock community composition             |                        | Mock community composition (mOTUs2)    |                        |
|-------------------------------------------------|------------------------|----------------------------------------|------------------------|
| species                                         | relative abundance (%) | detected species                       | relative abundance (%) |
| <i>Salmonella enterica</i>                      | 12                     | s__ <i>Salmonella enterica/bongori</i> | 18                     |
| <i>Enterococcus faecalis</i>                    | 12                     | s__ <i>Bacteria s.</i>                 | 18                     |
| <i>Escherichia coli</i>                         | 12                     | s__ <i>Proteobacteria sp.</i>          | 17                     |
| <i>Pseudomonas aeruginosa</i>                   | 12                     | s__ <i>Pseudomonas</i>                 | 11                     |
| <i>Staphylococcus aureus</i>                    | 12                     | s__ <i>Staphylococcus aureus</i>       | 11                     |
| <i>Lactobacillus fermentum</i>                  | 12                     | s__ <i>Lactobacillus fermentum</i>     | 9                      |
| <i>Bacillus subtilis</i>                        | 12                     | s__ <i>Bacteria sp.</i>                | 8                      |
| <i>Listeria monocytogenes</i>                   | 12                     | s__ <i>Listeria monocytogenes</i>      | 7                      |
| <i>Saccharomyces cerevisiae</i>                 | 2                      |                                        |                        |
| <i>Cryptococcus neoformans</i>                  | 2                      |                                        |                        |
| <i>ZymoBIOMICS Microbial Community Standard</i> |                        | other                                  | 1                      |

| Mock community composition (Metaphlan3) |                        |
|-----------------------------------------|------------------------|
| detected species                        | relative abundance (%) |
| s__ <i>Salmonella enterica</i>          | 20                     |
| s__ <i>Enterococcus faecalis</i>        | 18                     |
| s__ <i>Escherichia coli</i>             | 21                     |
| s__ <i>Pseudomonas aeruginosa_g</i>     | 4                      |
| s__ <i>Staphylococcus aureus</i>        | 12                     |
| s__ <i>Lactobacillus fermentum</i>      | 10                     |
| s__ <i>Bacillus intestinalis</i>        | 7                      |
| s__ <i>Listeria monocytogenes</i>       | 6                      |
| other                                   | 1                      |
